# Supplementary material
Source: MDPI journal article supplement (https://www.mdpi.com/2227-7102/11/1/32)
Supplement: s1 [file s1]

Archive with 3 entries (3 files):
- Appendix SI.pdf
- Appendix SII.pdf
- Appendix SIII.pdf
