# Supplementary material
Source: MDPI journal article supplement (https://www.mdpi.com/2227-7102/11/1/32)
Supplement: s1 [file s1 › Appendix SII.pdf]

## Appendix SII: Cultural Diversity Categories Framework

Adapted from:

Bishop, R. (1992). Multicultural literature for children: Making informed choices. In V. Harris (Ed.), *Teaching multicultural literature in grades K-8* (pp. 37-53). Norwood, MA: Christopher-Gordon.

| Categories           | Indicators                                                                                                                                                                                                                                                                                                                                                                                                                                 |
|----------------------|--------------------------------------------------------------------------------------------------------------------------------------------------------------------------------------------------------------------------------------------------------------------------------------------------------------------------------------------------------------------------------------------------------------------------------------------|
| Culturally Authentic | <ul style="list-style-type: none"><li>• “illuminate the experience of growing up a member of a particular, non-white cultural group” (Bishop, 1992)</li><li>• Have potential to increase appreciation and understandings of those not from this culture</li><li>• Books are written by people of the culture reflected in the book</li></ul>                                                                                               |
| Culturally Generic   | <ul style="list-style-type: none"><li>• “featuring characters who are members of so-called minority groups, but contain few, if any specific details that might serve to define those characters culturally.” (Bishop, 1992)</li><li>• Assumed audience is White</li><li>• Themes present White European American/ Australian values and activities</li><li>• Characters may be portrayed in stereotypical ways in illustrations</li></ul> |
| Culturally Neutral   | <ul style="list-style-type: none"><li>• “feature people of colour but are fundamentally about something else (Bishop, 1992)</li><li>• “cultural authenticity is not likely to be a major consideration” (Bishop, 1992)</li><li>• The character/s of “colour” could be replaced with a white character with no impact on the overall story</li></ul>                                                                                        |
| Solely Caucasian     | <ul style="list-style-type: none"><li>• All humans/characters are Caucasian</li></ul>                                                                                                                                                                                                                                                                                                                                                      |
| NA                   | <ul style="list-style-type: none"><li>• In animate characters or no characters at all</li><li>• E.G.: Animal Stories<br/>Concept books</li></ul>                                                                                                                                                                                                                                                                                           |
