# Supplementary material
Source: MDPI journal article supplement (https://www.mdpi.com/2227-7102/11/1/32)
Supplement: s1 [file s1 › Appendix SIII.pdf]

### Appendix SIII: Viewpoints and Ideologies Framework

**Based on the work of:** Boutte, G. S., Hopkins, R., & Waklatsi, T. (2008). Perspectives, voices, and worldviews in frequently read children's books. *Early Education and Development*, 19(6), 941-962.

**Title:**

**Author:**

**Publication Date:**

|                       |              |        |              |
|-----------------------|--------------|--------|--------------|
| Main character        |              |        |              |
| Ethnicity:            | Caucasian    |        |              |
| Notes/indicators:     |              |        |              |
| Gender:               | Male         | Female | neither/both |
| Notes/indicators:     |              |        |              |
| SES:                  | Low /working | Middle | Upper        |
| Notes/indicators:     |              |        |              |
|                       |              |        |              |
|                       |              |        |              |
|                       |              |        |              |
| Secondary character 1 |              |        |              |
| Ethnicity:            | Caucasian    |        |              |
| Notes/indicators:     |              |        |              |
| Gender:               | Male         | Female | neither/both |
| Notes/indicators:     |              |        |              |
| SES:                  | Low /working | Middle | Upper        |
| Notes/indicators:     |              |        |              |
|                       |              |        |              |
|                       |              |        |              |
|                       |              |        |              |
| Secondary character 2 |              |        |              |
| Ethnicity:            | Caucasian    |        |              |
| Notes/indicators:     |              |        |              |
| Gender:               | Male         | Female | neither/both |
| Notes/indicators:     |              |        |              |
| SES:                  | Low /working | Middle | Upper        |
| Notes/indicators:     |              |        |              |
|                       |              |        |              |
|                       |              |        |              |
|                       |              |        |              |
| Secondary character 3 |              |        |              |
| Ethnicity:            | Caucasian    |        |              |
| Notes/indicators:     |              |        |              |
| Gender:               | Male         | Female | neither/both |
| Notes/indicators:     |              |        |              |
| SES:                  | Low /working | Middle | Upper        |
| Notes/indicators:     |              |        |              |
|                       |              |        |              |
|                       |              |        |              |
|                       |              |        |              |

**Unspoken underlying messages – passive ideologies and assumptions.**

**Guiding Notes:**

**Categorization of Main Character for Ethnicity, Gender and SES.**

***Ethnicity***

**Indicators:**

Note references to race or ethnicity

Illustrations used as indicators of above.

***Gender – male/female/ neither/both***

**Indicators:**

Gender noted through storyline and/or illustrations. Use of pronouns such as “he” “she” used in case of animal stories or inanimate characters.

***SES – upper, middle, low/working, uncertain/not indicated.***

**Indicators:**

Indicators of SES – language use, context use such as furniture, dress, home and nature of activities performed by characters

Adults with white-collar/blue collar positions

Linear/sequential routines or other

**Categorization of Secondary Characters for Ethnicity, Gender and SES.**

**Secondary characters** selected and analysed **only** when more than one race included;

Chosen by ethnicity – if more than one of same ethnicity selected first to occur in either image or text – subjected to similar assessment as above.

**Unspoken underlying messages – passive ideologies and assumptions.**

Does the book affirm non-mainstream lifestyles and perspectives either covertly or overtly **OR**

Does the book facilitate the internalization of the ideologies and values of the dominant group (Freire 1970/1999)

Indicated either overtly or covertly by story and/or illustrations as below:

- Characters and actions; thoughts and feeling of the characters.
- Furniture, dress, home and nature of activities performed by characters

**Assessing Informational Texts**

**Information texts are analysed for:**

**Racial representation:** E.g.: Chinese, Australian, mixed etc

**Gender:** male, female, both, neither

**SES:** one or more e.g. middle, lower, middle and lower etc

**Minority/Dominant – this category classifies the overall viewpoint of the book eg:** promoting authentic, contemporary, stereotypical or exotic viewpoints of races, ethnicities represented

Classification of Majority/minority with room for comment e.g. Outdated.
